# Supplementary material for: Eradication of extensively drug resistant Pseudomonas aeruginosa causing ventilator-associated pneumonia in acute lymphoblastic leukemia patient using phage therapy
Source: Research Square preprint supplement (doi:10.21203/rs.3.rs-7802317/v1), 2025-10-20
Supplement: Supplementary file 2 [file a011f42b1b773a5d4a225708.xlsx]

## Sheet: Supplementary_Table_S1
Table S1. Antibiotic susceptibility of P. aeruginosa strains derived from the patient.
Strain	Culture	Species	Date	Colistin	Ceftolozane/Tazobactam	Gentamicin	Cefepime	Ceftazidime	Ceftazidime/Avibactam	Imipenem	Cipfloxacin	Fosfomycin	Piperacillin/Tazobactam	Meropenem	Tobramycin	Amikacin
C383.5	36145606	P. aeruginosa	2024-03-09	S	S (4)	S (<=1)	R (16)	R (>=64)	R (>=16)	R (>=16)	R (>=4)	R	R (>=128)	R (>=16)	-	-
C383.2	3614560601-1	P. aeruginosa	2024-03-11	S	-	S (<=1)	R (16)	R (>=64)	-	R (>=16)	R (>=4)	-	R (>=128)	R (>=16)	-	-
C383.6	3614560601-2	P. aeruginosa	2024-03-11	-	S (4)	-	R (16)	R (>=64)	R (>=16)	R (>=16)	R (>=4)	-	R (>=128)	R (>=16)	-	-
C383.1	3614633202-1	P. aeruginosa	2024-03-14	S	-	R (>=16)	R (16)	R (32)	-	R (>=16)	R (>=4)	-	R (>=128)	R (>=16)	-	R (>=64)
C383.4	3614633202-2	P. aeruginosa	2024-03-14	-	R (>=32)	-	R (16)	R (32)	R (>=16)	R (>=16)	R (>=4)	-	R (>=128)	R (>=16)	-	R (>=64)
C384	3615258201-1	P. aeruginosa	2024-03-16	-	-	S (<=1)	R (16)	I (16)	-	R (>=16)	R (>=4)	-	R (>=128)	R (>=16)	-	S (>=1)
C385	36174149	P. aeruginosa	2024-03-21	S	-	-	R (16)	R (>=64)	-	R (>=16)	R (>=4)	-	-	R (>=16)	-	-
C383.3	36208327	P. aeruginosa	2024-04-09	S	R (>=32)	-	R (16)	R (>=64)	R (>=16)	R (>=16)	R (>=4)	-	R (>=128)	R (>=16)	S	-
C386	3620832701-2	P. aeruginosa	2024-04-09	-	-	S (<=1)	R (16)	R (>=64)	-	R (8)	R (>=4)	-	R (>=128)	R (>=16)	-	S (2)
C387	3620832701-1	P. aeruginosa	2024-04-10	-	-	S (2)	R (16)	R (32)	-	R (>=16)	R (>=4)	-	R (>=128)	R (>=16)	-	R (32)
