# Supplementary material for: Eradication of extensively drug resistant Pseudomonas aeruginosa causing ventilator-associated pneumonia in acute lymphoblastic leukemia patient using phage therapy
Source: Research Square preprint supplement (doi:10.21203/rs.3.rs-7802317/v1), 2025-10-20
Supplement: Supplementary file 3 [file c30d1f77e8afe057d360660e.xlsx]

## Sheet: pseudomonas_aeruginosa_isolates
Table S3. Genomic features of clinical P. aeruginosa strains derived from other cases in Uruguay.
Strain	Genome Length	GC	Sequence Type	Clonal Complex	O-type	Alginate	Alginate biosynthesis	Alginate regulation	Alkaline protease	Deoxyhexose linking sugar 209 Da capping structure	ExoA	ExoS	ExoT	ExoU	ExoY	Flagella	HSI-1	HSI-I	LasA	LasB	LPS	Phenazines biosynthesis	PLC	Pyochelin	Pyocyanin	Pyoverdine	Pyoverdine	Quorum sensing	Rhamnolipid	Rhamnolipid biosynthesis	TTSS	Type IV pili	xcp secretion system	AMIKACIN/KANAMYCIN	AMIKACIN/KANAMYCIN/TOBRAMYCIN	AMINOGLYCOSIDE	BETA-LACTAM	BLEOMYCIN	CARBAPENEM	CEPHALOSPORIN	CHLORAMPHENICOL	CHLORAMPHENICOL/FLORFENICOL	EFFLUX	FLUOROQUINOLONE	FOSFOMYCIN	GENTAMICIN	GENTAMICIN/KANAMYCIN/TOBRAMYCIN	KANAMYCIN	STREPTOMYCIN
C440	6913554	65.98	235	235	O11	alg44,alg8,algA,algB,algD,algE,algF,algG,algI,algJ,algK,algL,algP/algR3,algQ,algR,algU,algX,algZ,mucA,mucB,mucC	algC	algW,mucD,mucE,mucP	aprA	fleS,flgA,flgB,flgM,flgN,fliA,fliK,fliL,motA,motB,motC,motD,motY	toxA		exoT	exoU	exoY	fleN,fleQ,fleR,flgC,flgD,flgE,flgF,flgG,flgH,flgI,flgJ,flgK,flhA,flhB,flhF,fliE,fliF,fliG,fliH,fliI,fliJ,fliM,fliN,fliO,fliP,fliQ,fliR	tagQ,tse1,tse2,tse3,vgrG1b	clpV1,dotU1,fha1,hcp1,hsiA1,hsiB1/vipA,hsiC1/vipB,hsiE1,hsiF1,hsiG1,hsiH1,hsiJ1,icmF1/tssM1,pppA,tagF/pppB,tagR,tagS,tagT,vgrG1a	lasA	lasB	waaA,waaC,waaF,waaG,waaP	phzA1,phzA1,phzB1,phzB1,phzG1,phzG1,phzH	plcH	fptA,pchA,pchB,pchC,pchD,pchE,pchF,pchG,pchH,pchI,pchR	phzM,phzS	mbtH-like,ptxR,pvcA,pvcB,pvcC,pvcD,pvdF,pvdG,pvdH,pvdL,pvdM,pvdN,pvdO,pvdP,pvdQ	pvdA,pvdS	lasI,rhlI		rhlC	exsA,exsB,exsC,exsD,exsE,pcr1,pcr2,pcr3,pcr4,pcrD,pcrG,pcrH,pcrR,pcrV,popB,popD,popN,pscB,pscC,pscD,pscE,pscF,pscG,pscH,pscI,pscJ,pscK,pscL,pscN,pscO,pscP,pscQ,pscR,pscS,pscT,pscU	chpA,chpB,chpC,chpD,chpE,fimT,fimU,fimV,pilB,pilE,pilF,pilG,pilH,pilI,pilJ,pilK,pilM,pilN,pilO,pilP,pilQ,pilR,pilS,pilT,pilU,pilV,pilW,pilX,pilY1,pilY2,xcpA/pilD	xcpP,xcpQ,xcpR,xcpS,xcpT,xcpU,xcpV,xcpW,xcpX,xcpY,xcpZ		aac(6')-Ib		blaOXA-129,blaOXA-488			blaOXA-17,blaPDC-35	catB3,catB7,cmx		mexA,mexE,mexX		fosA		ant(2'')-Ia	aph(3')-IIb	aadA6
C729	6531034	66.29	782	782	O6	alg44,alg8,algA,algB,algD,algE,algF,algG,algI,algJ,algK,algL,algP/algR3,algQ,algR,algU,algX,algZ,mucA,mucB,mucC	algC	algW,mucD,mucE,mucP	aprA	fleS,flgA,flgB,flgM,flgN,fliA,fliK,fliL,motA,motB,motC,motD,motY	toxA	exoS	exoT		exoY	fleN,fleQ,fleR,flgC,flgD,flgE,flgF,flgG,flgH,flgI,flgJ,flgK,flhA,flhB,flhF,fliE,fliF,fliG,fliH,fliI,fliJ,fliM,fliN,fliO,fliP,fliQ,fliR	tagQ,tse1,tse2,tse3,vgrG1b	clpV1,dotU1,fha1,hcp1,hsiA1,hsiB1/vipA,hsiC1/vipB,hsiE1,hsiF1,hsiG1,hsiH1,hsiJ1,icmF1/tssM1,lip1,pppA,tagF/pppB,tagR,tagS,tagT,vgrG1a	lasA	lasB	waaA,waaC,waaF,waaG,waaP	phzA1,phzA1,phzB1,phzD1,phzD1,phzE1,phzH	plcH	fptA,pchA,pchB,pchC,pchD,pchE,pchF,pchG,pchI,pchR	phzM,phzS	mbtH-like,ptxR,pvcA,pvcB,pvcC,pvcD,pvdF,pvdG,pvdH,pvdL,pvdM,pvdN,pvdO,pvdP,pvdQ	pvdA,pvdS	lasI,rhlI	rhlA,rhlB	rhlC	exsA,exsB,exsC,exsD,exsE,pcr1,pcr2,pcr3,pcr4,pcrD,pcrG,pcrH,pcrR,pcrV,popB,popD,popN,pscB,pscC,pscD,pscE,pscF,pscG,pscH,pscI,pscJ,pscK,pscL,pscN,pscO,pscP,pscQ,pscR,pscS,pscT,pscU	chpA,chpB,chpC,chpD,chpE,fimT,fimU,fimV,pilA,pilB,pilC,pilE,pilF,pilG,pilH,pilI,pilJ,pilK,pilM,pilN,pilO,pilP,pilQ,pilR,pilS,pilT,pilU,pilV,pilW,pilX,pilY1,pilY2,xcpA/pilD	xcpP,xcpQ,xcpR,xcpS,xcpT,xcpU,xcpV,xcpW,xcpX,xcpY,xcpZ				blaOXA-50			blaPDC-3	catB7		mexA,mexE,mexX	crpP,crpP	fosA			aph(3')-IIb
C1	6415154	66.47	1527	1527	O6	alg44,alg8,algA,algB,algD,algE,algF,algG,algI,algJ,algK,algL,algP/algR3,algQ,algR,algU,algX,algZ,mucA,mucB,mucC	algC	algW,mucD,mucE,mucP	aprA	fleS,flgA,flgB,flgM,flgN,fliA,fliK,fliL,motA,motB,motC,motD,motY	toxA	exoS	exoT		exoY	fleN,fleQ,fleR,flgC,flgD,flgE,flgF,flgG,flgH,flgI,flgJ,flgK,flhA,flhB,flhF,fliE,fliF,fliG,fliH,fliI,fliJ,fliM,fliN,fliO,fliP,fliQ,fliR	tagQ,tse1,tse2,tse3,vgrG1b	clpV1,dotU1,fha1,hcp1,hsiA1,hsiB1/vipA,hsiC1/vipB,hsiE1,hsiF1,hsiG1,hsiH1,hsiJ1,icmF1/tssM1,lip1,pppA,tagF/pppB,tagR,tagS,tagT,vgrG1a	lasA	lasB	waaA,waaC,waaF,waaG,waaP	phzA1,phzA1,phzB1,phzB1,phzD1,phzH	plcH	fptA,pchA,pchB,pchC,pchD,pchE,pchF,pchG,pchH,pchI,pchR	phzM,phzS	mbtH-like,ptxR,pvcA,pvcB,pvcC,pvcD,pvdF,pvdG,pvdH,pvdL,pvdM,pvdN,pvdO,pvdP,pvdQ	pvdA,pvdS	lasI,rhlI	rhlA,rhlB	rhlC	exsA,exsB,exsC,exsD,exsE,pcr1,pcr2,pcr3,pcr4,pcrD,pcrG,pcrH,pcrR,pcrV,popB,popD,popN,pscB,pscC,pscD,pscE,pscF,pscG,pscH,pscI,pscJ,pscK,pscL,pscN,pscO,pscP,pscQ,pscR,pscS,pscT,pscU	chpA,chpB,chpC,chpD,chpE,fimT,fimU,fimV,pilA,pilB,pilC,pilE,pilF,pilG,pilH,pilI,pilJ,pilK,pilM,pilN,pilO,pilP,pilQ,pilR,pilS,pilT,pilU,pilV,pilW,pilX,pilY1,pilY2,xcpA/pilD	xcpP,xcpQ,xcpR,xcpS,xcpT,xcpU,xcpV,xcpW,xcpX,xcpY,xcpZ				blaOXA-50			blaPDC-171	catB7		mexA,mexE,mexX		fosA			aph(3')-IIb
C633	6289378	66.51	3046	3046	O6	alg44,alg8,algA,algB,algD,algE,algF,algG,algI,algJ,algK,algL,algP/algR3,algQ,algR,algU,algX,algZ,mucB,mucC	algC	algW,mucD,mucE,mucP	aprA	fleS,flgA,flgB,flgM,flgN,fliA,fliK,fliL,motA,motB,motC,motD,motY	toxA	exoS	exoT		exoY	fleN,fleQ,fleR,flgC,flgD,flgE,flgF,flgG,flgH,flgI,flgJ,flgK,flhA,flhB,flhF,fliE,fliF,fliG,fliH,fliI,fliJ,fliM,fliN,fliO,fliP,fliQ,fliR	tagQ,tse1,tse2,tse3,vgrG1b	clpV1,dotU1,fha1,hcp1,hsiA1,hsiB1/vipA,hsiC1/vipB,hsiE1,hsiF1,hsiG1,hsiH1,hsiJ1,icmF1/tssM1,lip1,ppkA,pppA,tagF/pppB,tagR,tagS,tagT,vgrG1a	lasA	lasB	waaA,waaC,waaF,waaG,waaP	phzA1,phzA1,phzB1,phzB1,phzD1,phzH	plcH	fptA,pchA,pchB,pchC,pchD,pchE,pchF,pchG,pchH,pchI,pchR	phzM,phzS	mbtH-like,ptxR,pvcA,pvcB,pvcC,pvcD,pvdF,pvdG,pvdH,pvdL,pvdM,pvdN,pvdO,pvdP,pvdQ	pvdA,pvdS	lasI,rhlI	rhlA,rhlB	rhlC	exsA,exsB,exsC,exsD,exsE,pcr1,pcr2,pcr3,pcr4,pcrD,pcrG,pcrH,pcrR,pcrV,popB,popD,popN,pscB,pscC,pscD,pscE,pscF,pscG,pscH,pscI,pscJ,pscK,pscL,pscN,pscO,pscP,pscQ,pscR,pscS,pscT,pscU	chpA,chpB,chpC,chpD,chpE,fimT,fimU,fimV,pilB,pilC,pilE,pilF,pilG,pilH,pilI,pilJ,pilK,pilM,pilN,pilO,pilP,pilQ,pilR,pilS,pilT,pilU,pilV,pilW,pilX,pilY1,pilY2,xcpA/pilD	xcpP,xcpQ,xcpR,xcpS,xcpT,xcpU,xcpV,xcpW,xcpX,xcpY,xcpZ				blaOXA-1014			blaPDC-192	catB7		mexA,mexE,mexX		fosA			aph(3')-IIb
C627	7040523	66.06	959	959	O6	alg44,alg8,algA,algB,algD,algE,algF,algG,algI,algJ,algK,algL,algP/algR3,algQ,algR,algU,algX,algZ,mucA,mucB,mucC	algC	algW,mucD,mucE,mucP	aprA	fleS,flgA,flgB,flgM,flgN,fliA,fliK,fliL,motA,motB,motC,motD,motY	toxA	exoS	exoT		exoY	fleN,fleQ,fleR,flgC,flgD,flgE,flgF,flgG,flgH,flgI,flgJ,flgK,flhA,flhB,flhF,fliE,fliF,fliG,fliH,fliI,fliJ,fliM,fliN,fliO,fliP,fliP,fliQ,fliQ,fliR,fliR	tagQ,tse1,tse2,tse3,vgrG1b	clpV1,dotU1,hcp1,hsiA1,hsiB1/vipA,hsiC1/vipB,hsiE1,hsiF1,hsiG1,hsiH1,hsiJ1,icmF1/tssM1,lip1,ppkA,pppA,tagF/pppB,tagR,tagS,tagT,vgrG1a	lasA	lasB	waaA,waaC,waaF,waaG,waaP	phzA1,phzA1,phzB1,phzB1,phzF1,phzG1,phzH	plcH	fptA,pchA,pchB,pchC,pchD,pchE,pchF,pchG,pchH,pchI,pchR	phzM,phzS	mbtH-like,ptxR,pvcA,pvcB,pvcC,pvcD,pvdF,pvdG,pvdH,pvdI,pvdJ,pvdL,pvdM,pvdN,pvdO,pvdP,pvdQ	fpvA,pvdA,pvdE,pvdS	lasI,rhlI	rhlA,rhlB	rhlC	exsA,exsB,exsC,exsD,exsE,pcr1,pcr2,pcr3,pcr4,pcrD,pcrG,pcrH,pcrR,pcrV,popB,popD,popN,pscB,pscC,pscD,pscE,pscF,pscG,pscH,pscI,pscJ,pscK,pscL,pscN,pscO,pscP,pscQ,pscR,pscS,pscT,pscU	chpA,chpB,chpC,chpD,chpE,fimT,fimU,fimV,pilB,pilE,pilF,pilG,pilH,pilI,pilJ,pilK,pilM,pilN,pilO,pilP,pilQ,pilR,pilS,pilT,pilU,pilV,pilW,pilX,pilY1,pilY2,xcpA/pilD	xcpP,xcpQ,xcpR,xcpS,xcpT,xcpU,xcpV,xcpW,xcpX,xcpY,xcpZ				blaOXA-50			blaPDC-103	catB7		mexA,mexE,mexX	crpP	fosA			aph(3')-IIb
C557	7156484	65.8	395	395	O6	alg44,alg8,algA,algB,algD,algE,algF,algG,algI,algJ,algK,algL,algP/algR3,algQ,algR,algU,algX,algZ,mucA,mucB,mucC	algC	algW,mucD,mucE,mucP	aprA	fleS,flgA,flgB,flgM,flgN,fliA,fliK,fliL,motA,motB,motC,motD,motY	toxA	exoS	exoT		exoY	fleN,fleQ,fleR,flgC,flgD,flgE,flgF,flgG,flgH,flgI,flgJ,flgK,flhA,flhB,flhF,fliE,fliF,fliG,fliH,fliI,fliJ,fliM,fliN,fliO,fliP,fliQ,fliR	tagQ,tse1,tse2,tse3,vgrG1b	clpV1,dotU1,fha1,hcp1,hsiA1,hsiB1/vipA,hsiC1/vipB,hsiE1,hsiF1,hsiG1,hsiH1,hsiJ1,icmF1/tssM1,lip1,ppkA,pppA,tagF/pppB,tagR,tagS,tagT,vgrG1a	lasA	lasB	waaA,waaC,waaF,waaG,waaP	phzA1,phzA1,phzB1,phzB1,phzE1,phzF1,phzF1,phzG1,phzG1,phzH	plcH	fptA,pchA,pchB,pchC,pchD,pchE,pchF,pchG,pchH,pchI,pchR	phzM,phzS	mbtH-like,ptxR,pvcA,pvcB,pvcC,pvcD,pvdF,pvdG,pvdH,pvdL,pvdM,pvdN,pvdO,pvdP,pvdQ	fpvA,pvdA,pvdD,pvdE,pvdS	lasI,rhlI	rhlA,rhlB	rhlC	exsA,exsB,exsC,exsD,exsE,pcr1,pcr2,pcr3,pcr4,pcrD,pcrG,pcrH,pcrR,pcrV,popB,popD,popN,pscB,pscC,pscD,pscE,pscF,pscG,pscH,pscI,pscJ,pscK,pscL,pscN,pscO,pscP,pscQ,pscR,pscS,pscT,pscU	chpA,chpB,chpC,chpD,chpE,fimT,fimU,fimV,pilB,pilC,pilE,pilF,pilG,pilH,pilI,pilJ,pilK,pilM,pilN,pilO,pilP,pilQ,pilR,pilS,pilT,pilU,pilV,pilW,pilX,pilY1,pilY2,xcpA/pilD	xcpP,xcpQ,xcpR,xcpS,xcpT,xcpU,xcpV,xcpW,xcpX,xcpY,xcpZ	aph(3')-VIa			blaOXA-905,blaTEM		blaVIM-2	blaPDC-8,blaPER-1	catB7,cml		mexA,mexE,mexX	crpP	fosA			aph(3')-IIb
C576	6695772	66.15	-		O6	alg44,alg8,algA,algB,algD,algE,algF,algG,algI,algJ,algK,algL,algP/algR3,algQ,algR,algU,algX,algZ,mucA,mucB,mucC	algC	algW,mucD,mucE,mucP	aprA	fleI/flag,fleP,fleS,flgA,flgB,flgM,flgN,fliA,fliK,fliL,fliS,motA,motB,motC,motD,motY	toxA	exoS	exoT		exoY	fleN,fleQ,fleR,flgC,flgD,flgE,flgF,flgG,flgH,flgI,flgJ,flgK,flgL,flhA,flhB,flhF,fliC,fliD,fliE,fliF,fliG,fliH,fliI,fliJ,fliM,fliN,fliO,fliP,fliQ,fliR	tagQ,tse1,tse2,tse3,vgrG1b	clpV1,dotU1,fha1,hcp1,hsiA1,hsiB1/vipA,hsiC1/vipB,hsiE1,hsiF1,hsiG1,hsiH1,hsiJ1,icmF1/tssM1,lip1,ppkA,pppA,tagF/pppB,tagR,tagS,tagT,vgrG1a	lasA	lasB	waaA,waaC,waaF,waaG,waaP	phzA1,phzA1,phzB1,phzB1,phzE1,phzF1,phzG1,phzH	plcH	fptA,pchA,pchB,pchC,pchD,pchE,pchF,pchG,pchH,pchI,pchR	phzM,phzS	mbtH-like,ptxR,pvcA,pvcB,pvcC,pvcD,pvdF,pvdG,pvdH,pvdL,pvdM,pvdN,pvdO,pvdP,pvdQ	pvdA,pvdS	lasI,rhlI	rhlA,rhlB	rhlC	exsA,exsB,exsC,exsD,exsE,pcr1,pcr2,pcr3,pcr4,pcrD,pcrG,pcrH,pcrR,pcrV,popB,popD,popN,pscB,pscC,pscD,pscE,pscF,pscG,pscH,pscI,pscJ,pscK,pscL,pscN,pscO,pscP,pscQ,pscR,pscS,pscT,pscU	chpA,chpB,chpC,chpD,chpE,fimT,fimU,fimV,pilB,pilC,pilE,pilF,pilG,pilH,pilI,pilJ,pilK,pilM,pilN,pilO,pilP,pilQ,pilR,pilS,pilT,pilU,pilV,pilW,pilX,pilY1,pilY2,xcpA/pilD	xcpP,xcpQ,xcpR,xcpS,xcpT,xcpU,xcpV,xcpW,xcpX,xcpY,xcpZ				blaOXA-904			blaPDC-5	catB7		mexA,mexE,mexX	crpP	fosA			aph(3')-IIb
C476	6494782	66.4	-		O6	alg44,alg8,algA,algB,algD,algE,algF,algG,algI,algJ,algK,algL,algP/algR3,algQ,algR,algU,algX,algZ,mucA,mucB,mucC	algC	algW,mucD,mucE,mucP	aprA	fleI/flag,fleP,fleS,flgA,flgB,flgM,flgN,fliA,fliK,fliL,fliS,motA,motB,motC,motD,motY	toxA	exoS	exoT		exoY	fleN,fleQ,fleR,flgC,flgD,flgE,flgF,flgG,flgH,flgI,flgJ,flgK,flgL,flhA,flhB,flhF,fliC,fliD,fliE,fliF,fliG,fliH,fliI,fliJ,fliM,fliN,fliO,fliP,fliQ,fliR	tagQ,tse1,tse2,tse3,vgrG1b	clpV1,dotU1,fha1,hcp1,hsiA1,hsiB1/vipA,hsiC1/vipB,hsiE1,hsiF1,hsiG1,hsiH1,hsiJ1,icmF1/tssM1,lip1,ppkA,pppA,tagF/pppB,tagR,tagS,tagT,vgrG1a	lasA	lasB	waaA,waaC,waaF,waaG,waaP	phzA1,phzA1,phzB1,phzB1,phzE1,phzE1,phzF1,phzF1,phzH	plcH	fptA,pchA,pchB,pchC,pchD,pchE,pchF,pchG,pchH,pchI,pchR	phzM,phzS	mbtH-like,ptxR,pvcA,pvcB,pvcC,pvcD,pvdF,pvdG,pvdH,pvdL,pvdM,pvdN,pvdO,pvdP,pvdQ	pvdA,pvdS	lasI,rhlI	rhlA,rhlB	rhlC	exsA,exsB,exsC,exsD,exsE,pcr1,pcr2,pcr3,pcr4,pcrD,pcrG,pcrH,pcrR,pcrV,popB,popD,popN,pscB,pscC,pscD,pscE,pscF,pscG,pscH,pscI,pscJ,pscK,pscL,pscN,pscO,pscP,pscQ,pscR,pscS,pscT,pscU	chpA,chpB,chpC,chpD,chpE,fimT,fimU,fimV,pilB,pilE,pilF,pilG,pilH,pilI,pilJ,pilK,pilM,pilN,pilO,pilP,pilQ,pilR,pilS,pilT,pilU,pilV,pilW,pilX,pilY1,pilY2,xcpA/pilD	xcpP,xcpQ,xcpR,xcpS,xcpT,xcpU,xcpV,xcpW,xcpX,xcpY,xcpZ				blaOXA-486			blaPDC-3	catB7		mexA,mexE,mexX	crpP	fosA			aph(3')-IIb
C661	6438349	66.46	485	485	O4	alg44,alg8,algA,algB,algD,algE,algF,algG,algI,algJ,algK,algL,algP/algR3,algQ,algR,algU,algX,algZ,mucA,mucB,mucC	algC	algW,mucD,mucE,mucP	aprA	fleS,flgA,flgB,flgM,flgN,fliA,fliK,fliL,motA,motB,motC,motD,motY	toxA	exoS	exoT		exoY	fleN,fleQ,fleR,flgC,flgD,flgE,flgF,flgG,flgH,flgI,flgJ,flgK,flhA,flhB,flhF,fliE,fliF,fliG,fliH,fliI,fliJ,fliM,fliN,fliO,fliP,fliQ,fliR	tagQ,tse1,tse2,tse3,vgrG1b	clpV1,dotU1,fha1,hcp1,hsiA1,hsiB1/vipA,hsiC1/vipB,hsiE1,hsiF1,hsiG1,hsiH1,hsiJ1,icmF1/tssM1,lip1,ppkA,pppA,tagF/pppB,tagR,tagS,tagT,vgrG1a	lasA	lasB	waaA,waaC,waaF,waaG,waaP	phzA1,phzA1,phzB1,phzB1,phzC1,phzD1,phzE1,phzF1,phzH	plcH	fptA,pchA,pchB,pchC,pchD,pchE,pchF,pchG,pchH,pchI,pchR	phzM,phzS	mbtH-like,ptxR,pvcA,pvcB,pvcC,pvcD,pvdF,pvdG,pvdH,pvdI,pvdL,pvdM,pvdN,pvdO,pvdP,pvdQ	fpvA,pvdA,pvdE,pvdS	lasI,rhlI	rhlA,rhlB	rhlC	exsA,exsB,exsC,exsD,exsE,pcr1,pcr2,pcr3,pcr4,pcrD,pcrG,pcrH,pcrR,pcrV,popB,popD,popN,pscB,pscC,pscD,pscE,pscF,pscG,pscH,pscI,pscJ,pscK,pscL,pscN,pscO,pscP,pscQ,pscR,pscS,pscT,pscU	chpA,chpB,chpC,chpD,chpE,fimT,fimU,fimV,pilB,pilE,pilF,pilG,pilH,pilI,pilJ,pilK,pilM,pilN,pilO,pilP,pilQ,pilR,pilS,pilT,pilU,pilV,pilW,pilX,pilY1,pilY2,xcpA/pilD	xcpP,xcpQ,xcpR,xcpS,xcpT,xcpU,xcpV,xcpW,xcpX,xcpY,xcpZ				blaOXA-50			blaPDC-6	catB7		mexA,mexE,mexX		fosA			aph(3')-IIb
C104	6591321	66.32	1195	1195	O12	alg44,alg8,algA,algB,algD,algE,algF,algG,algI,algJ,algK,algL,algP/algR3,algQ,algR,algU,algX,algZ,mucA,mucB,mucC	algC	algW,mucD,mucE,mucP	aprA	fleS,flgA,flgB,flgM,flgN,fliA,fliK,fliL,motA,motB,motC,motD,motY						fleN,fleQ,fleR,flgC,flgD,flgE,flgF,flgG,flgH,flgI,flgJ,flgK,flhA,flhB,flhF,fliE,fliF,fliG,fliH,fliI,fliJ,fliM,fliN,fliO,fliP,fliQ,fliR	tagQ,tse1,tse2,tse3,vgrG1b	clpV1,dotU1,fha1,hcp1,hsiA1,hsiB1/vipA,hsiC1/vipB,hsiE1,hsiF1,hsiG1,hsiH1,hsiJ1,icmF1/tssM1,lip1,pppA,tagF/pppB,tagR,tagS,tagT,vgrG1a	lasA	lasB	waaA,waaC,waaF,waaG,waaP	phzA1,phzA1,phzB1,phzB1,phzG1	plcH	fptA,pchA,pchB,pchC,pchD,pchE,pchF,pchG,pchH,pchI,pchR	phzM,phzS	mbtH-like,ptxR,pvcA,pvcB,pvcC,pvcD,pvdF,pvdG,pvdH,pvdL,pvdM,pvdN,pvdO,pvdP,pvdQ	pvdA,pvdS	lasI,rhlI	rhlA,rhlB			chpA,chpB,chpC,chpD,chpE,fimU,fimV,pilB,pilE,pilF,pilG,pilH,pilI,pilJ,pilK,pilM,pilN,pilO,pilP,pilQ,pilR,pilS,pilT,pilU,pilV,pilW,pilX,pilY1,pilY2,xcpA/pilD	xcpP,xcpQ,xcpR,xcpS,xcpT,xcpU,xcpV,xcpW,xcpX,xcpY,xcpZ	aph(3')-VIa			blaOXA,blaTEM	ble	blaVIM-2	blaPDC-33	catA,cml,cmx		mexA,mexE,mexX	crpP		aac(3)-IIe,aac(6')-Ib		aph(3')-II,aph(3')-IIa	aadA6,aph(3'')-Ib,aph(6)-Ic,aph(6)-Id
[truncated: 2 more columns]
