# Supplementary material for: Eradication of extensively drug resistant Pseudomonas aeruginosa causing ventilator-associated pneumonia in acute lymphoblastic leukemia patient using phage therapy
Source: Research Square preprint supplement (doi:10.21203/rs.3.rs-7802317/v1), 2025-10-20
Supplement: Supplementary file 4 [file c70c179b3f2228e0df412e21.xlsx]

## Sheet: biofilm_and_case_amr
Table S2. Main antimicrobial resistance genetic determinants found in analyzed genomes.
Strain	Gene	Annotation	Class	Subclass
C104	blaTEM	TEM family class A beta-lactamase	BETA-LACTAM	BETA-LACTAM
C104	sul1	sulfonamide-resistant dihydropteroate synthase Sul1	SULFONAMIDE	SULFONAMIDE
C104	blaOXA	OXA-50-var family class D beta-lactamase	BETA-LACTAM	BETA-LACTAM
C104	catA	type A chloramphenicol O-acetyltransferase	PHENICOL	CHLORAMPHENICOL
C104	crpP	ICE-associated protein CrpP	FLUOROQUINOLONE	FLUOROQUINOLONE
C104	mexX	multidrug efflux RND transporter periplasmic adaptor subunit MexX	EFFLUX	EFFLUX
C104	mexA	multidrug efflux RND transporter periplasmic adaptor subunit MexA	EFFLUX	EFFLUX
C104	merB	organomercurial lyase MerB	NA	NA
C104	merR	mercury resistance transcriptional regulator MerR	MERCURY	MERCURY
C104	merP	mercury resistance system periplasmic binding protein MerP	MERCURY	MERCURY
C104	merE	broad-spectrum mercury transporter MerE	MERCURY	MERCURY
C104	merD	mercury resistance co-regulator MerD	MERCURY	MERCURY
C104	merA	mercury(II) reductase	MERCURY	MERCURY
C104	merP	mercury resistance system periplasmic binding protein MerP	MERCURY	MERCURY
C104	merT	mercuric transport protein MerT	MERCURY	MERCURY
C104	merR	mercury resistance transcriptional regulator MerR	MERCURY	MERCURY
C104	merP	mercury resistance system periplasmic binding protein MerP	MERCURY	MERCURY
C104	merC	organomercurial transporter MerC	MERCURY	ORGANOMERCURY
C104	merA	mercury(II) reductase	MERCURY	MERCURY
C104	cmx	chloramphenicol efflux MFS transporter Cmx	PHENICOL	CHLORAMPHENICOL
C104	aac(6')-Ib	AAC(6')-Ib family aminoglycoside 6'-N-acetyltransferase	AMINOGLYCOSIDE	GENTAMICIN
C104	aph(3')-IIa	aminoglycoside O-phosphotransferase APH(3')-IIa	AMINOGLYCOSIDE	KANAMYCIN
C104	ble	bleomycin binding protein BLMT	BLEOMYCIN	BLEOMYCIN
C104	aph(6)-Ic	aminoglycoside O-phosphotransferase APH(6)-Ic	AMINOGLYCOSIDE	STREPTOMYCIN
C104	merR	mercury resistance transcriptional regulator MerR	MERCURY	MERCURY
C104	merT	mercuric transport protein MerT	MERCURY	MERCURY
C104	merP	mercury resistance system periplasmic binding protein MerP	MERCURY	MERCURY
C104	merA	mercury(II) reductase	MERCURY	MERCURY
C104	merD	mercury resistance co-regulator MerD	MERCURY	MERCURY
C104	merE	broad-spectrum mercury transporter MerE	MERCURY	MERCURY
C104	aph(6)-Id	aminoglycoside O-phosphotransferase APH(6)-Id	AMINOGLYCOSIDE	STREPTOMYCIN
C104	aph(3'')-Ib	aminoglycoside O-phosphotransferase APH(3'')-Ib	AMINOGLYCOSIDE	STREPTOMYCIN
C104	mexE	multidrug efflux RND transporter periplasmic adaptor subunit MexE	EFFLUX	EFFLUX
C104	aac(3)-IIe	aminoglycoside N-acetyltransferase AAC(3)-IIe	AMINOGLYCOSIDE	GENTAMICIN
C104	cml	Cmx/CmrA family chloramphenicol efflux MFS transporter	PHENICOL	CHLORAMPHENICOL
C104	aph(3')-VIa	aminoglycoside O-phosphotransferase APH(3')-VIa	AMINOGLYCOSIDE	AMIKACIN/KANAMYCIN
C104	aadA6	ANT(3'')-Ia family aminoglycoside nucleotidyltransferase AadA6	AMINOGLYCOSIDE	STREPTOMYCIN
C104	blaPDC-33	class C beta-lactamase PDC-33	BETA-LACTAM	CEPHALOSPORIN
C104	aph(3')-II	APH(3')-II family aminoglycoside O-phosphotransferase	AMINOGLYCOSIDE	KANAMYCIN
C104	blaVIM-2	subclass B1 metallo-beta-lactamase VIM-2	BETA-LACTAM	CARBAPENEM
C1	blaPDC-171	class C beta-lactamase PDC-171	BETA-LACTAM	CEPHALOSPORIN
C1	aph(3')-IIb	aminoglycoside O-phosphotransferase APH(3')-IIb	AMINOGLYCOSIDE	KANAMYCIN
C1	catB7	type B-4 chloramphenicol O-acetyltransferase CatB7	PHENICOL	CHLORAMPHENICOL
C1	fosA	FosA family fosfomycin resistance glutathione transferase	FOSFOMYCIN	FOSFOMYCIN
C1	mexA	multidrug efflux RND transporter periplasmic adaptor subunit MexA	EFFLUX	EFFLUX
C1	mexE	multidrug efflux RND transporter periplasmic adaptor subunit MexE	EFFLUX	EFFLUX
C1	mexX	multidrug efflux RND transporter periplasmic adaptor subunit MexX	EFFLUX	EFFLUX
C1	blaOXA-50	oxacillin-hydrolyzing class D beta-lactamase OXA-50	BETA-LACTAM	BETA-LACTAM
C440	mexX	multidrug efflux RND transporter periplasmic adaptor subunit MexX	EFFLUX	EFFLUX
C440	mexE	multidrug efflux RND transporter periplasmic adaptor subunit MexE	EFFLUX	EFFLUX
C440	merP	mercury resistance system periplasmic binding protein MerP	MERCURY	MERCURY
C440	blaPDC-35	class C beta-lactamase PDC-35	BETA-LACTAM	CEPHALOSPORIN
C440	aph(3')-IIb	aminoglycoside O-phosphotransferase APH(3')-IIb	AMINOGLYCOSIDE	KANAMYCIN
C440	catB7	type B-4 chloramphenicol O-acetyltransferase CatB7	PHENICOL	CHLORAMPHENICOL
C440	mexA	multidrug efflux RND transporter periplasmic adaptor subunit MexA	EFFLUX	EFFLUX
C440	blaOXA-488	OXA-50 family oxacillin-hydrolyzing class D beta-lactamase OXA-488	BETA-LACTAM	BETA-LACTAM
C440	merE	broad-spectrum mercury transporter MerE	MERCURY	MERCURY
C440	merD	mercury resistance co-regulator MerD	MERCURY	MERCURY
C440	merA	mercury(II) reductase	MERCURY	MERCURY
C440	merC	organomercurial transporter MerC	MERCURY	ORGANOMERCURY
C440	merP	mercury resistance system periplasmic binding protein MerP	MERCURY	MERCURY
C440	merT	mercuric transport protein MerT	MERCURY	MERCURY
C440	merR	mercury resistance transcriptional regulator MerR	MERCURY	MERCURY
C440	merR	mercury resistance transcriptional regulator MerR	MERCURY	MERCURY
C440	merT	mercuric transport protein MerT	MERCURY	MERCURY
C440	merP	mercury resistance system periplasmic binding protein MerP	MERCURY	MERCURY
C440	merA	mercury(II) reductase	MERCURY	MERCURY
C440	merD	mercury resistance co-regulator MerD	MERCURY	MERCURY
C440	merE	broad-spectrum mercury transporter MerE	MERCURY	MERCURY
C440	ant(2'')-Ia	aminoglycoside nucleotidyltransferase ANT(2'')-Ia	AMINOGLYCOSIDE	GENTAMICIN/KANAMYCIN/TOBRAMYCIN
C440	catB3	type B-3 chloramphenicol O-acetyltransferase CatB3	PHENICOL	CHLORAMPHENICOL
C440	blaOXA-129	OXA-5 family class D beta-lactamase OXA-129	BETA-LACTAM	BETA-LACTAM
C440	dfrA5	trimethoprim-resistant dihydrofolate reductase DfrA5	TRIMETHOPRIM	TRIMETHOPRIM
C440	aac(6')-Ib	AAC(6')-Ib family aminoglycoside 6'-N-acetyltransferase	AMINOGLYCOSIDE	AMIKACIN/KANAMYCIN/TOBRAMYCIN
C440	cmx	chloramphenicol efflux MFS transporter Cmx	PHENICOL	CHLORAMPHENICOL
C440	blaOXA-17	OXA-10 family extended-spectrum class D beta-lactamase OXA-17	BETA-LACTAM	CEPHALOSPORIN
C440	sul1	sulfonamide-resistant dihydropteroate synthase Sul1	SULFONAMIDE	SULFONAMIDE
C440	qacEdelta1	quaternary ammonium compound efflux SMR transporter QacE delta 1	QUATERNARY AMMONIUM	QUATERNARY AMMONIUM
C440	aadA6	ANT(3'')-Ia family aminoglycoside nucleotidyltransferase AadA6	AMINOGLYCOSIDE	STREPTOMYCIN
C440	fosA	FosA family fosfomycin resistance glutathione transferase	FOSFOMYCIN	FOSFOMYCIN
C476	mexX	multidrug efflux RND transporter periplasmic adaptor subunit MexX	EFFLUX	EFFLUX
C476	blaPDC-3	extended-spectrum class C beta-lactamase PDC-3	BETA-LACTAM	CEPHALOSPORIN
C476	aph(3')-IIb	aminoglycoside O-phosphotransferase APH(3')-IIb	AMINOGLYCOSIDE	KANAMYCIN
C476	fosA	FosA family fosfomycin resistance glutathione transferase	FOSFOMYCIN	FOSFOMYCIN
C476	catB7	type B-4 chloramphenicol O-acetyltransferase CatB7	PHENICOL	CHLORAMPHENICOL
C476	mexA	multidrug efflux RND transporter periplasmic adaptor subunit MexA	EFFLUX	EFFLUX
C476	mexE	multidrug efflux RND transporter periplasmic adaptor subunit MexE	EFFLUX	EFFLUX
C476	crpP	ICE-associated protein CrpP	FLUOROQUINOLONE	FLUOROQUINOLONE
C476	blaOXA-486	OXA-50 family oxacillin-hydrolyzing class D beta-lactamase OXA-486	BETA-LACTAM	BETA-LACTAM
C576	blaPDC-5	extended-spectrum class C beta-lactamase PDC-5	BETA-LACTAM	CEPHALOSPORIN
C576	aph(3')-IIb	aminoglycoside O-phosphotransferase APH(3')-IIb	AMINOGLYCOSIDE	KANAMYCIN
C576	mexE	multidrug efflux RND transporter periplasmic adaptor subunit MexE	EFFLUX	EFFLUX
C576	mexA	multidrug efflux RND transporter periplasmic adaptor subunit MexA	EFFLUX	EFFLUX
C576	catB7	type B-4 chloramphenicol O-acetyltransferase CatB7	PHENICOL	CHLORAMPHENICOL
C576	crpP	ICE-associated protein CrpP	FLUOROQUINOLONE	FLUOROQUINOLONE
C576	blaOXA-904	OXA-50 family oxacillin-hydrolyzing class D beta-lactamase OXA-904	BETA-LACTAM	BETA-LACTAM
C576	fosA	FosA family fosfomycin resistance glutathione transferase	FOSFOMYCIN	FOSFOMYCIN
C576	mexX	multidrug efflux RND transporter periplasmic adaptor subunit MexX	EFFLUX	EFFLUX
C627	blaOXA-50	oxacillin-hydrolyzing class D beta-lactamase OXA-50	BETA-LACTAM	BETA-LACTAM
C627	blaPDC-103	class C beta-lactamase PDC-103	BETA-LACTAM	CEPHALOSPORIN
C627	aph(3')-IIb	aminoglycoside O-phosphotransferase APH(3')-IIb	AMINOGLYCOSIDE	KANAMYCIN
C627	fosA	FosA family fosfomycin resistance glutathione transferase	FOSFOMYCIN	FOSFOMYCIN
C627	mexX	multidrug efflux RND transporter periplasmic adaptor subunit MexX	EFFLUX	EFFLUX
C627	crpP	ICE-associated protein CrpP	FLUOROQUINOLONE	FLUOROQUINOLONE
C627	clpK	heat shock survival AAA family ATPase ClpK	NA	NA
C627	shsP	small heat shock protein sHSP20-GI	NA	NA
C627	yfdX1	heat resistance protein YfdX1	NA	NA
C627	yfdX2	heat resistance protein YfdX2	NA	NA
C627	hdeD-GI	heat resistance membrane protein HdeD-GI	NA	NA
C627	trxLHR	heat resistance system thioredoxin Trx-GI	NA	NA
C627	kefB-GI	heat resistance system K+/H+ antiporter KefB-GI	NA	NA
C627	psi-GI	heat resistance protein PsiE-GI	NA	NA
C627	catB7	type B-4 chloramphenicol O-acetyltransferase CatB7	PHENICOL	CHLORAMPHENICOL
C627	mexA	multidrug efflux RND transporter periplasmic adaptor subunit MexA	EFFLUX	EFFLUX
C627	merR	mercury resistance transcriptional regulator MerR	MERCURY	MERCURY
C627	merT	mercuric transport protein MerT	MERCURY	MERCURY
C627	merP	mercury resistance system periplasmic binding protein MerP	MERCURY	MERCURY
C627	merF	mercury resistance system transport protein MerF	MERCURY	MERCURY
C627	merA	mercury(II) reductase	MERCURY	MERCURY
C627	merD	mercury resistance co-regulator MerD	MERCURY	MERCURY
C627	merE	broad-spectrum mercury transporter MerE	MERCURY	MERCURY
C627	mexE	multidrug efflux RND transporter periplasmic adaptor subunit MexE	EFFLUX	EFFLUX
C633	mexE	multidrug efflux RND transporter periplasmic adaptor subunit MexE	EFFLUX	EFFLUX
C633	blaOXA-1014	OXA-50 family oxacillin-hydrolyzing class D beta-lactamase OXA-1014	BETA-LACTAM	BETA-LACTAM
C633	mexX	multidrug efflux RND transporter periplasmic adaptor subunit MexX	EFFLUX	EFFLUX
C633	blaPDC-192	class C beta-lactamase PDC-192	BETA-LACTAM	CEPHALOSPORIN
C633	aph(3')-IIb	aminoglycoside O-phosphotransferase APH(3')-IIb	AMINOGLYCOSIDE	KANAMYCIN
C633	catB7	type B-4 chloramphenicol O-acetyltransferase CatB7	PHENICOL	CHLORAMPHENICOL
C633	fosA	FosA family fosfomycin resistance glutathione transferase	FOSFOMYCIN	FOSFOMYCIN
C633	mexA	multidrug efflux RND transporter periplasmic adaptor subunit MexA	EFFLUX	EFFLUX
C383_1	oprD_V359L	Pseudomonas aeruginosa carbapenem resistant OprD	BETA-LACTAM	CARBAPENEM
C383_1	blaOXA-396	OXA-50 family oxacillin-hydrolyzing class D beta-lactamase OXA-396	BETA-LACTAM	BETA-LACTAM
C383_1	blaPDC-5	extended-spectrum class C beta-lactamase PDC-5	BETA-LACTAM	CEPHALOSPORIN
C383_1	aph(3')-IIb	aminoglycoside O-phosphotransferase APH(3')-IIb	AMINOGLYCOSIDE	KANAMYCIN
C383_1	fosA	FosA family fosfomycin resistance glutathione transferase	FOSFOMYCIN	FOSFOMYCIN
C383_1	gyrA_T83I	Pseudomonas aeruginosa quinolone resistant GyrA	QUINOLONE	QUINOLONE
C383_1	catB7	type B-4 chloramphenicol O-acetyltransferase CatB7	PHENICOL	CHLORAMPHENICOL
C383_2	oprD_V359L	Pseudomonas aeruginosa carbapenem resistant OprD	BETA-LACTAM	CARBAPENEM
C383_2	blaOXA-396	OXA-50 family oxacillin-hydrolyzing class D beta-lactamase OXA-396	BETA-LACTAM	BETA-LACTAM
C383_2	blaPDC-5	extended-spectrum class C beta-lactamase PDC-5	BETA-LACTAM	CEPHALOSPORIN
C383_2	aph(3')-IIb	aminoglycoside O-phosphotransferase APH(3')-IIb	AMINOGLYCOSIDE	KANAMYCIN
C383_2	fosA	FosA family fosfomycin resistance glutathione transferase	FOSFOMYCIN	FOSFOMYCIN
C383_2	gyrA_T83I	Pseudomonas aeruginosa quinolone resistant GyrA	QUINOLONE	QUINOLONE
C383_2	catB7	type B-4 chloramphenicol O-acetyltransferase CatB7	PHENICOL	CHLORAMPHENICOL
C383_4	gyrA_T83I	Pseudomonas aeruginosa quinolone resistant GyrA	QUINOLONE	QUINOLONE
C383_4	oprD_V359L	Pseudomonas aeruginosa carbapenem resistant OprD	BETA-LACTAM	CARBAPENEM
C383_4	blaOXA-396	OXA-50 family oxacillin-hydrolyzing class D beta-lactamase OXA-396	BETA-LACTAM	BETA-LACTAM
C383_4	blaPDC-5	extended-spectrum class C beta-lactamase PDC-5	BETA-LACTAM	CEPHALOSPORIN
C383_4	aph(3')-IIb	aminoglycoside O-phosphotransferase APH(3')-IIb	AMINOGLYCOSIDE	KANAMYCIN
C383_4	fosA	FosA family fosfomycin resistance glutathione transferase	FOSFOMYCIN	FOSFOMYCIN
C383_4	catB7	type B-4 chloramphenicol O-acetyltransferase CatB7	PHENICOL	CHLORAMPHENICOL
C383_6	blaOXA-396	OXA-50 family oxacillin-hydrolyzing class D beta-lactamase OXA-396	BETA-LACTAM	BETA-LACTAM
C383_6	oprD_V359L	Pseudomonas aeruginosa carbapenem resistant OprD	BETA-LACTAM	CARBAPENEM
C383_6	blaPDC-5	extended-spectrum class C beta-lactamase PDC-5	BETA-LACTAM	CEPHALOSPORIN
C383_6	aph(3')-IIb	aminoglycoside O-phosphotransferase APH(3')-IIb	AMINOGLYCOSIDE	KANAMYCIN
C383_6	fosA	FosA family fosfomycin resistance glutathione transferase	FOSFOMYCIN	FOSFOMYCIN
C383_6	gyrA_T83I	Pseudomonas aeruginosa quinolone resistant GyrA	QUINOLONE	QUINOLONE
C383_6	catB7	type B-4 chloramphenicol O-acetyltransferase CatB7	PHENICOL	CHLORAMPHENICOL
C384	oprD_V359L	Pseudomonas aeruginosa carbapenem resistant OprD	BETA-LACTAM	CARBAPENEM
C384	blaOXA-396	OXA-50 family oxacillin-hydrolyzing class D beta-lactamase OXA-396	BETA-LACTAM	BETA-LACTAM
C384	blaPDC-5	extended-spectrum class C beta-lactamase PDC-5	BETA-LACTAM	CEPHALOSPORIN
C384	aph(3')-IIb	aminoglycoside O-phosphotransferase APH(3')-IIb	AMINOGLYCOSIDE	KANAMYCIN
C384	fosA	FosA family fosfomycin resistance glutathione transferase	FOSFOMYCIN	FOSFOMYCIN
C384	gyrA_T83I	Pseudomonas aeruginosa quinolone resistant GyrA	QUINOLONE	QUINOLONE
C384	catB7	type B-4 chloramphenicol O-acetyltransferase CatB7	PHENICOL	CHLORAMPHENICOL
C385	oprD_V359L	Pseudomonas aeruginosa carbapenem resistant OprD	BETA-LACTAM	CARBAPENEM
C385	blaOXA-396	OXA-50 family oxacillin-hydrolyzing class D beta-lactamase OXA-396	BETA-LACTAM	BETA-LACTAM
C385	blaPDC-5	extended-spectrum class C beta-lactamase PDC-5	BETA-LACTAM	CEPHALOSPORIN
C385	aph(3')-IIb	aminoglycoside O-phosphotransferase APH(3')-IIb	AMINOGLYCOSIDE	KANAMYCIN
C385	fosA	FosA family fosfomycin resistance glutathione transferase	FOSFOMYCIN	FOSFOMYCIN
C385	gyrA_T83I	Pseudomonas aeruginosa quinolone resistant GyrA	QUINOLONE	QUINOLONE
C385	catB7	type B-4 chloramphenicol O-acetyltransferase CatB7	PHENICOL	CHLORAMPHENICOL
C386	gyrA_T83I	Pseudomonas aeruginosa quinolone resistant GyrA	QUINOLONE	QUINOLONE
C386	oprD_V359L	Pseudomonas aeruginosa carbapenem resistant OprD	BETA-LACTAM	CARBAPENEM
C386	blaOXA-396	OXA-50 family oxacillin-hydrolyzing class D beta-lactamase OXA-396	BETA-LACTAM	BETA-LACTAM
C386	blaPDC-264	class C beta-lactamase PDC-264	BETA-LACTAM	CEPHALOSPORIN
C386	aph(3')-IIb	aminoglycoside O-phosphotransferase APH(3')-IIb	AMINOGLYCOSIDE	KANAMYCIN
C386	fosA	FosA family fosfomycin resistance glutathione transferase	FOSFOMYCIN	FOSFOMYCIN
C386	catB7	type B-4 chloramphenicol O-acetyltransferase CatB7	PHENICOL	CHLORAMPHENICOL
C387	oprD_V359L	Pseudomonas aeruginosa carbapenem resistant OprD	BETA-LACTAM	CARBAPENEM
C387	blaPDC-264	class C beta-lactamase PDC-264	BETA-LACTAM	CEPHALOSPORIN
C387	aph(3')-IIb	aminoglycoside O-phosphotransferase APH(3')-IIb	AMINOGLYCOSIDE	KANAMYCIN
C387	blaOXA-396	OXA-50 family oxacillin-hydrolyzing class D beta-lactamase OXA-396	BETA-LACTAM	BETA-LACTAM
C387	fosA	FosA family fosfomycin resistance glutathione transferase	FOSFOMYCIN	FOSFOMYCIN
C387	gyrA_T83I	Pseudomonas aeruginosa quinolone resistant GyrA	QUINOLONE	QUINOLONE
C387	catB7	type B-4 chloramphenicol O-acetyltransferase CatB7	PHENICOL	CHLORAMPHENICOL
